# Supplementary material for: Rab34 small GTPase is required for Hedgehog signaling and an early step of ciliary vesicle formation in mouse
Source: Oxford University Press journal article supplement (doi:10.1242/jcs.213710), 2018-10-09
Supplement: jcs213710supp.pdf [file jcs213710supp.pdf]

|        |       |                                                               |        |
|--------|-------|---------------------------------------------------------------|--------|
| WT     | 10857 | CGGATCAGGCCTCTGCGCCTTCCCGGGGAGCCCCGCAAGGCCGAGACAAGATGAACATT   | 10916  |
| Mutant | 206   | CGGATCAGGCCTCTGCGCCTTCCCGGGGAGCCCCGCAAGGCCGAGACAAGATGAACATT   | 147    |
|        |       | Exon 2                                                        | Intron |
| WT     | 10917 | CTGGCGCCCCGTGCGGAGGGACCGCGTCCTGGCGGAGCTGCCCCAGGTAGGCACCAGGGCC | 10976  |
| Mutant | 146   | CTGGC-----GCC                                                 | 139    |
| WT     | 10977 | ACGTCGGGCCTCTGGCTGTTCGCTGAGTGTGGGCGGGGAGAAGGTGGCCCAGCCCCGTCGC | 11036  |
| Mutant | 138   | ACGTCGGGCCTCTGGCTGTTCGCTGAGTGTGGGCGGGGAGAAGGTGGCCCAGCCCCGTCGC | 79     |
| WT     | 11037 | CCTGCAAGGCCCGCTGCCTCCTGGGTGGTCCGCTTCCCACCCACCCCCAGCCCAGGGCTG  | 11096  |
| Mutant | 78    | CCTGCAAGGCCCGCTGCCTCCTGGGTGGTCCGCTTCCCACCCACCCCCAGCCCAGGGCTG  | 19     |
| WT     | 11097 | CT                                                            | 11098  |
| Mutant | 18    | CT                                                            | 17     |

Figure S1. A Rab34 CRISPR mutant allele.

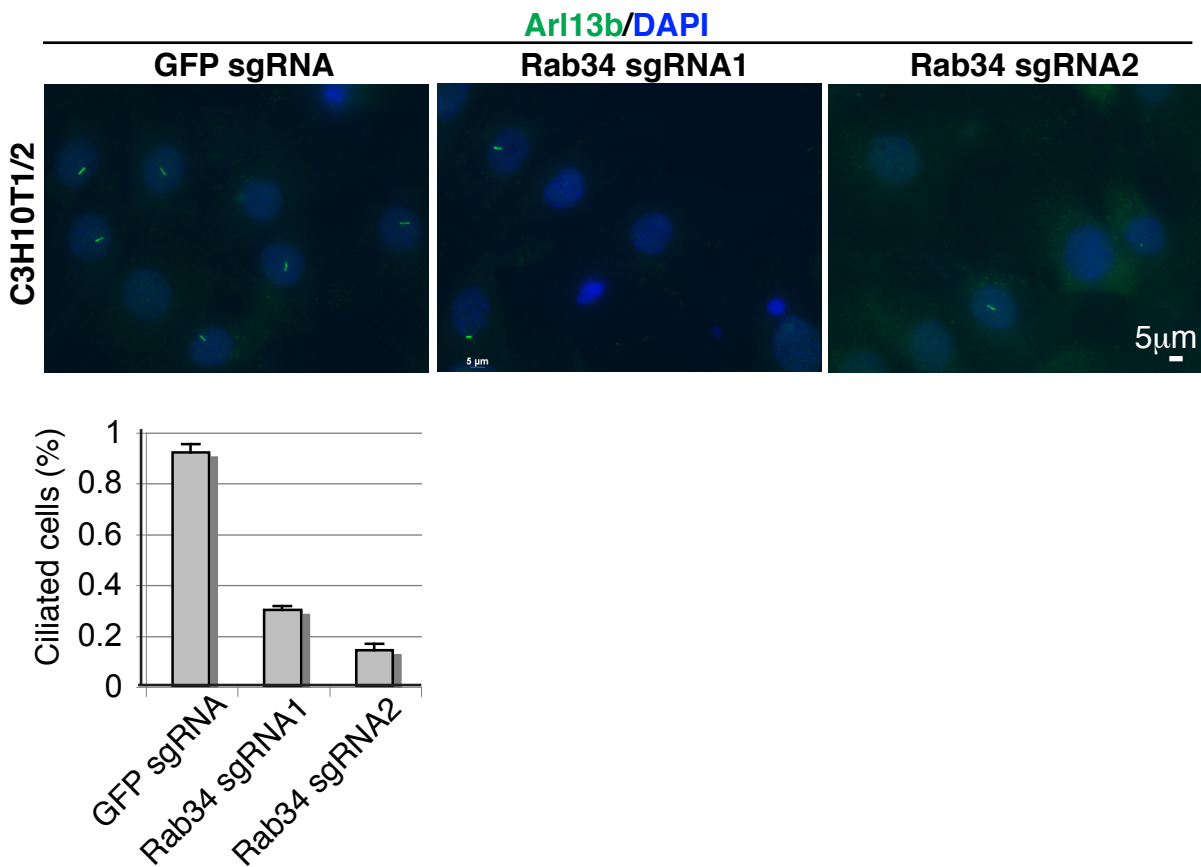

**Figure S2.** Loss of Rab34 in cultured cells results in a significant decrease in ciliogenesis. C3H10T1/2 cells were stably infected with Lentivirus that expressed sgRNAs as indicated. The cells were then immunostained for Arl13b, a ciliary marker, and counterstained for nuclei (DAPI). Two-tailed Student t-test P values  $\leq 0.0001$  (n = 3 independent experiments,  $\geq 100$  cells counted for each category).

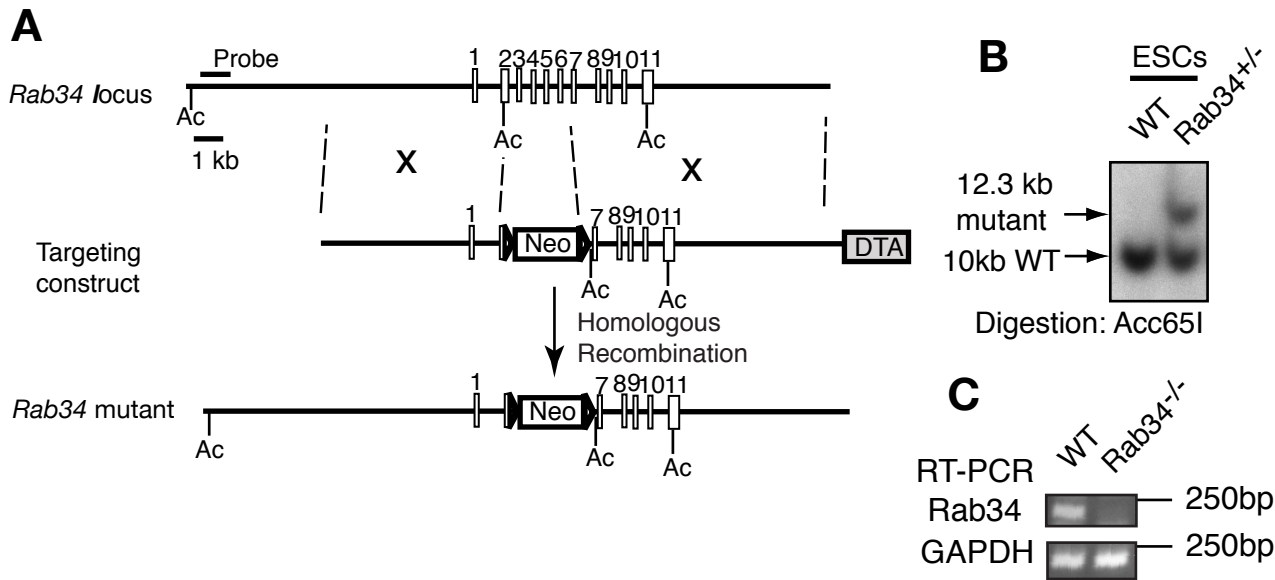

**Figure S3.** (A) The gene targeting strategy used to create a mouse Rab34 mutant allele. Open rectangles are referred to as exons and lines as introns. The probe used for Southern blot is shown. Triangle, loxP site; Neo, neomycin; DTA, diphtheria toxin A; number, exons; Ac, Acc65I. (B) Southern blot of representative mutant and wild type (wt) ES cell clones (n = 1 experiment). (C) RT-PCR shows that Rab34 transcript is undetectable in the mutant. GAPDH is a control.

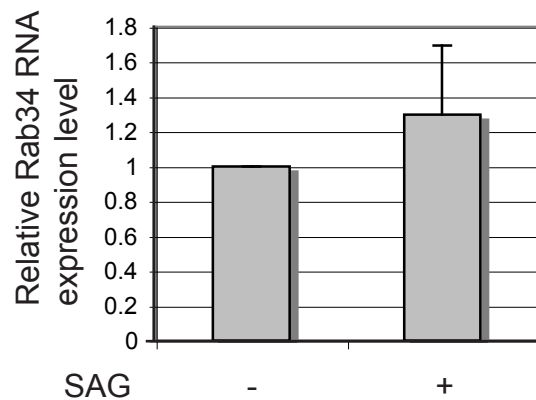

**Figure S4.** Activation of Hedgehog signaling does not significantly increase Rab34 RNA expression. RT-qPCR showing relative Rab34 RNA expression level in WT MEFs after stimulation with SAG. Two-tailed Student t-test p value is 0.176, not significant.

**Table S1 Rab34 mutant E10.5 embryos**

| Phenotypes                          | Genotypes |     |     |       |
|-------------------------------------|-----------|-----|-----|-------|
|                                     | +/+       | +/- | -/- | Total |
|                                     | 11        | 24  | 10  | 45    |
| Heart looping<br>(left orientation) | 11        | 24  | 10  | 45    |
